# Supplementary material for: From Folk Taxonomy to Species Confirmation of Acorus (Acoraceae): Evidences Based on Phylogenetic and Metabolomic Analyses
Source: Front Plant Sci. 2020 Jun 24;11:965. doi: 10.3389/fpls.2020.00965 (PMC7327505; doi:10.3389/fpls.2020.00965)
Supplement: Supplementary file 7 [file Table_4.xlsx]

## Sheet: Sheet1
	Supplementary Table S4. The main features of 39 compounds
	Compounds	1	2	3	4	5	6	7	8	9	10	11	12	13	14	15	16	17	18	19	20	21	22	23	24	25	26	27	28	29	30	31	32	33	34	35	36	37	38	39
Areas	RT	0.72	0.93	1.09	1.17	1.45	1.24	1.3	1.33	1.24	1.45	1.45	1.52	1.53	1.45	1.55	1.65	1.77	1.77	1.79	1.86	2.11	2.17	2.27	2.55	2.9	3.17	3.26	3.34	3.57	3.7	3.81	4.12	4.29	4.29	2.79	3.09	3.47	3.62	4.45
	M/Z	166.087	188.071	611.171	401.165	401.165	463.124	265.106	177.056	771.218	771.218	265.106	815.237	219.101	305.137	305.137	685.177	279.121	314.144	197.08	247.094	291.157	359.204	273.147	257.153	245.152	219.175	277.217	364.321	205.196	372.311	219.173	219.173	485.113	335.152	311.186	318.301	520.343	439.209	609.271
Leaf	LL11	3295.33	11638.3	149.333	0	2519.67	24669.3	934	7931.33	324	0	708.333	0	4275.33	581	0	2727.33	3088	5073.67	4028.33	573.667	215.667	9395	0	0	28	278.333	15204	4712	1488.67	1310.33	5722.33	2900	11076.3	3466.33	2233	2100.33	134.333	439	39144
	LL12	2947.67	10767.3	135.667	0	2396	24738	854.333	8008.67	253.667	0	851.667	0	4332.67	471	0	2750	2812.33	4970.33	4023	514	362.667	8202.67	0	0	24.3333	248.333	14681.3	4810	1321	1337	4881	2770.33	13169.3	3376.67	2319.67	1937	170.667	394.667	38008.3
	LL13	3345	12246.7	142.333	0	2320.33	24216.7	893.333	7840	276.333	0	686	0	4027.67	464.667	0	2701.33	3387.33	5188.33	4161.67	570	257.667	9296.67	221	0	15.3333	310.667	15031.7	5203	1155.33	1514.67	4037.67	2961	10023.3	3211.33	2651	2711	175.667	465.333	39854.3
	LL21	1989.67	6267.67	0	3613.33	1898.67	1139.33	311	0	0	3650	1396.67	1163	2649.33	0	0	0	1914.67	245	1115.33	1215	212.333	7251	29.3333	70.6667	419	138.333	3485.33	2945.67	1037.33	1532	161	2211.67	14060.3	2037	2529.67	3919	144.333	1263.67	5134
	LL22	1638	3936.67	7255.67	3004.67	3933	0	379	0	0	2555	160	186.667	3391.67	0	0	0	283.333	227.667	1095.67	205	140	5094.67	57.6667	85	153.667	138.667	3547.67	2219.33	1714	1634.67	320	3231.67	13552.3	2812.33	2486	2300.67	200	633.667	5820.67
	LL23	1927.33	2336	2009.33	642.667	254.667	181	240	0	0	2211	0	196.333	1835.33	0	0	0	152	93.3333	681.333	140.333	67.3333	4729	58	52.3333	120.333	345	2684.67	2403.67	1900	1561.33	182.333	2180	13945.3	2373.67	2732.67	2429.33	70.6667	197	5453.67
	LL31	454	880.667	2041	311	569	38	89	6731.33	0	5373.33	0	0	3201.67	0	0	0	226.333	64.6667	659	128	87	4949.67	25	46	81	161.667	3799.33	1053.67	440.667	1388.33	118.333	1241	9764.33	2314.67	2669	1024	188	0	4966.33
	LL32	1012	2055.33	9670	377.333	1119	52.6667	149.667	15007.7	0	10245.7	0	0	3006.67	23.6667	0	0	92.6667	103	403	141.667	291.333	3401	18.6667	53	156.333	154.333	2311.67	585	508	1169.67	182.667	4566	14947.7	1869.33	2449.67	945.667	250	0	2407.67
	LL33	1035.33	7914.33	4503	279	784.667	35	114.667	12898.3	0	6151	0	0	2995.67	0	0	0	88.6667	595	672.667	118	178.333	5650.33	0	36.6667	72.3333	192.667	3332.67	693.333	477.333	1259	56	1839	9137	2359.33	2246.67	1037.33	216.667	22	4225.67
	LL34	1062.67	2870	5412.67	279.333	213.667	10	93	7263.67	0	3867.67	0	0	1403	0	0	0	58	2311	1389	50	156.667	4562	60.3333	23.3333	71.3333	180	3155	709	112	1181.67	0	1643.33	11009.7	3399.67	1963.67	955	2153.33	0	2225.67
	LL41	3640.33	8025.33	17928.3	3666.33	350.333	65.6667	0	13913.7	49.3333	12537.3	0	0	2799	13	0	0	130.667	461	443.333	102.333	184.667	5263.67	54.3333	220	61.3333	118.667	4524.33	252	1686	1330	0	1340.67	12698.3	3976.33	2241.33	2570	7525.33	0	0
	LL42	8815	13283.3	9397.67	3699.67	0	116	0	15524.3	35	18596.3	0	37	6647.67	0	0	0	149.333	278.333	893.667	163	761.333	9925	155.333	574.667	133	106.667	5713	262	6621.67	1333.67	0	1113.67	13390.7	1822.33	2319.67	7933	3792	0	0
	LL43	3356.33	7144	16968.3	3467.67	354.333	78.3333	0	13284.3	44.6667	14290.3	0	0	2696.33	0	20.3333	0	159.333	1655.33	384.333	88	50	5422	87.6667	210	66	85	4444.33	285	1884.67	1233.67	0	1221.67	11512	3877.67	2167	2543	10461	0	0
Rhizome	LR11	1601	1648.33	0	0	0	0	11142.3	0	109.333	0	0	5388.33	0	116.333	832.333	12501.7	15153.7	100.667	23277.3	7605.33	28145.3	18182.3	12146.3	0	4127	67998	2600.67	177.333	1781.67	1186	6259.67	63.6667	5975	1260.33	3072	1053.33	1590	0	35.3333
	LR12	2403	1153	0	0	3345.33	0	2724.33	122.667	70.6667	0	0	1256.33	0	0	1920	59167	7758	131.667	3453	3319.67	12108	11430	66998.3	0	6422.67	244057	3115.67	71.6667	872.667	1246.33	2332.67	33.6667	4657	1699.33	2436	792.333	899.333	0	49.3333
	LR13	817.333	1355	0	0	16.6667	0	423.667	0	41.3333	0	0	197	0	86	331.333	9690.67	840	541.333	699	285.333	16857.7	4505.67	6164.67	0	889	3723	476	245.333	563	1133	2880.33	0	6979.67	1217	2537.67	198.667	7068	0	0
	LR21	866.333	1349.67	0	320.333	1487	10.3333	20624.3	96.6667	0	0	0	6903.67	77	296	0	295.333	14182	962.333	51357.7	8527	524.333	10639.7	0	534.667	22026.3	1561.67	1140.67	36.3333	10142.3	1227.67	1099.67	0	7814.67	1178	2471	1992.67	268.333	488	83.6667
	LR22	437.333	1574	0	129	1485	0	4703.67	0	0	0	0	2497.67	71.6667	433.667	0	104	4546.33	958.333	15074	2650.67	96.3333	8480.67	0	110	742	631.667	935.333	26.3333	9240	1298	719	13.3333	9790.67	2825	2242.33	1273.33	2327	895.667	0
	LR23	1152.33	2215	83.3333	306.667	1590.33	79.6667	3630.33	47.6667	0	0	31.6667	1112	269	667.667	0	277.333	2932.33	816.333	11585.7	1995	39.6667	7896	107	208.667	464.333	354.667	611	82.6667	51432	1352.67	3441.67	26	9742.33	1415.67	2223.67	1255.33	556.333	1856.33	0
	LR31	827	1739	28.6667	59.6667	948.667	0	199	0	0	201.333	81	0	0	177.667	0	0	216	527.667	442.667	102.333	169.333	5381.67	71.3333	167.667	70.6667	100	1027	49	705.667	1578.67	0	0	7682.33	1409.33	2277.33	420.667	212	0	68.6667
	LR32	797.333	945.333	228.667	66.6667	1055.33	12.3333	266.667	673.667	0	673.667	0	0	0	398	0	0	385.667	1531.33	552.667	93	279.667	6171	110.667	635.333	84	109	602.667	11.3333	509	1646.67	0	0	4788.33	628.667	2508.33	951	269.333	30.3333	80
	LR33	862.667	1154	75.3333	25	727.333	11.6667	141	811	0	250.667	17	0	0	203.333	0	0	112.333	1028.67	308	57.3333	28	5598.33	77.6667	451.333	88.6667	200.333	841	46.3333	2409.33	1638.33	0	0	12106.7	654.333	2335.33	716.667	141	0	33.6667
	LR34	2760	1838.33	28.6667	0	138	0	74.3333	208.333	0	0	0	0	0	114.333	0	0	15.6667	1569.67	194.667	16	40	5102.33	29.6667	67	194.333	111.667	520.333	60.3333	710.333	1760	0	0	7605.33	861	2447.67	284.667	1212.67	42	108
	LR41	835	2722	67	133.333	1172.33	0	34	0	0	0	65.6667	0	0	292	0	78.6667	0	1265.67	141.667	0	789.667	5581	151.333	1997.67	186.667	429.667	548.667	56.3333	9536.67	1754.67	1258	54.6667	5809.33	0	2923.67	1669.33	240.333	0	51.6667
	LR42	1507	1267	98.3333	200	927	0	56.6667	0	0	0	155.667	0	0	154.667	0	37	0	2053.33	257.667	0	209.667	6852.67	92.6667	883.333	93.3333	123.667	1263.67	154.667	4851.67	1828	1520.33	0	10756.3	0	3019.67	548.333	2621.67	51	13
	LR43	857.333	2674.67	58	108.667	1073	0	90	0	8	0	66	0	0	247.333	0	132.667	0	1069.33	123.667	0	533.667	6371.33	83.6667	1700	146	301.333	466.667	58.6667	12977	1718.33	1745	58.6667	11170.3	0	3032.67	1285.67	238.667	0	39
	Compounds with the same mass are isomerides
